# Supplementary material for: Ultra-sensitive luminescence thermometry based on MgNb2O6:Dy3+/Pr3+ thermochromic phosphors
Source: Royal Society of Chemistry journal article supplement (doi:10.1039/d2qi01591a), 2022-01-01
Supplement: d2qi01591a1.pdf [file d2qi01591a1.pdf]

Supplementary Information for

**Ultra-sensitive luminescent thermometry based on  $\text{MgNb}_2\text{O}_6$ :  $\text{Dy}^{3+}/\text{Pr}^{3+}$  thermochromic phosphor**

Lei Zhong<sup>a</sup>, Sha Jiang<sup>\*a</sup>, Xihui Wang<sup>a</sup>, Yutong Wang<sup>a</sup>, Jialiang Xie<sup>a</sup>, Yanru Li<sup>a</sup>, Binyao Huang<sup>a</sup>, Yongjie Wang<sup>a</sup>, Guotao Xiang<sup>a</sup>, Li Li<sup>a</sup>, Xianju Zhou<sup>a</sup>, Min Yin<sup>\*b</sup>

<sup>a</sup>School of Science, Chongqing University of Posts and Telecommunications, Chongqing 400065, China

<sup>b</sup>School of Physical Sciences, University of Science and Technology of China, Hefei 230026, China

\*Corresponding author: [jiangsha@cqupt.edu.cn](mailto:jiangsha@cqupt.edu.cn) (S. Jiang), [yinmin@ustc.edu.cn](mailto:yinmin@ustc.edu.cn) (M. Yin).

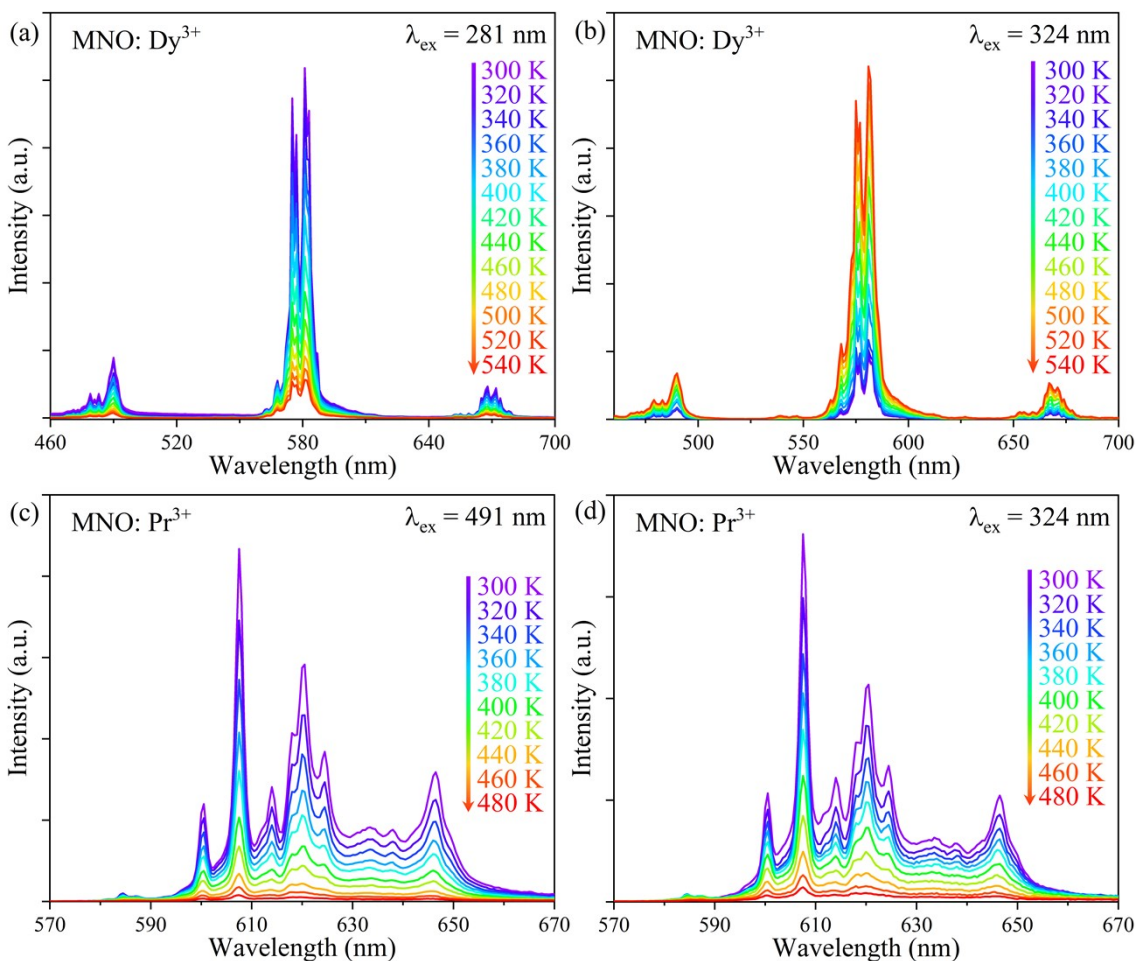

Fig. S1 Temperature dependence PL spectra of  $\text{MNO: Dy}^{3+}$  at (a) 281 and (b) 324 nm excitation and  $\text{MNO: Pr}^{3+}$  at (c) 491 and (d) 324 nm excitation.

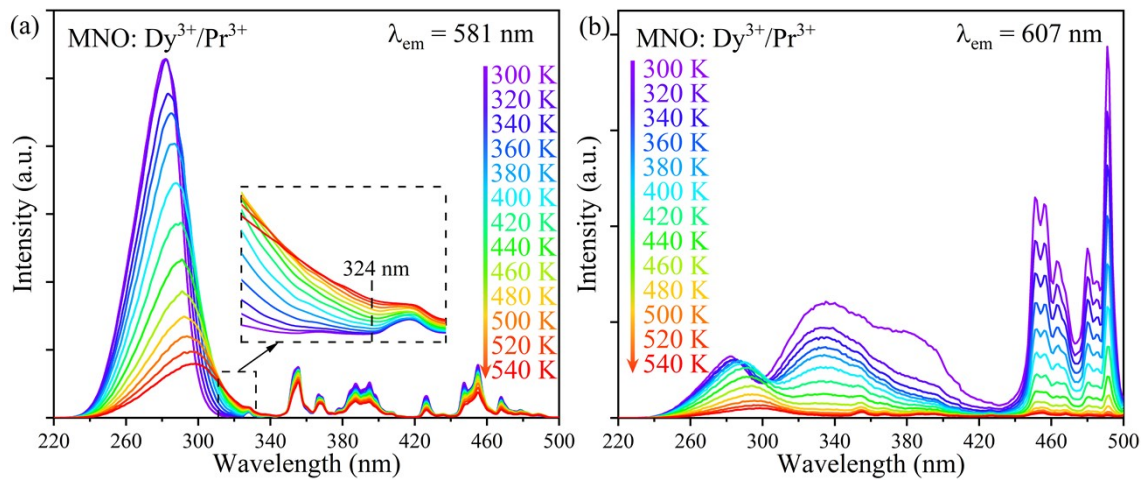

Fig. S2 Temperature dependent PLE spectra of MNO: Dy<sup>3+</sup>/Pr<sup>3+</sup> monitoring at (a) 581 nm (insets show a partially enlarged view) and (b) 607 nm.
